# Supplementary material
Source: Research Square preprint supplement (doi:10.21203/rs.3.rs-9804004/v1)
Supplement: Supplementary file 1 [file b83be0be3b6c8df8bc8bf79e.docx]

**Table S1.** Proximate analysis of *Rhizoclonium hookeri* biochar.

| **Components** | **Amount (%)** |
| --- | --- |
| Moisture content | 6.4 |
| Volatile content | 44.80 |
| Ash content | 46.17 |
| Fixed carbon content | 2.63 |
| % Yield | 69 |

**Table S2.** Calibration data for MG dye

| S.NO | Concentration (mg/ml) | Absorbance (a.u) |
| --- | --- | --- |
| 1 | 10 | 0.168 |
| 2 | 20 | 0.319 |
| 3 | 30 | 0.479 |
| 4 | 40 | 0.642 |
| 5 | 50 | 0.805 |
| 6 | 60 | 0.945 |
| 7 | 70 | 1.099 |

**Figure S1.** Calibration curve illustrates the relationship between the absorbance of MG and its concentration.

**Table S3.** Elemental composition of *Rhizoclonium hookeri* biochar.

| **Element** | **%Weight** | **Atomic** **%** | **Elements** | **% Weight** | **Atomic** |
| --- | --- | --- | --- | --- | --- |
| C | 31.92 | 43.29 | Cl | 0.23 | 0.10 |
| O | 43.83 | 44.63 | K | 3.58 | 1.49 |
| Mg | 1.40 | 0.94 | Ca | 2.90 | 1.18 |
| Al | 3.23 | 1.95 | Fe | 2.24 | 0.65 |
| Si | 8.41 | 4.88 | Cu | 1.05 | 0.27 |
| S | 1.23 | 0.62 | Total | 100.00 | 100.00 |

**Table S4.** Parameters extracted from pseudo-first-order and pseudo-second-order kinetic model.

| **Pseudo-first-order kinetics** | | | | | **Pseudo-second-order kinetics** | | | | | |
| --- | --- | --- | --- | --- | --- | --- | --- | --- | --- | --- |
| **qe (mg g-1) experimental** | **qe (mg g-1) calculated** | **R²** | **RMSE** | **K1 (1/min)** | | **qe (mg g-1) calculated** | **qe (mg g-1) experimental** | **R²** | **K2** | **RMSE** | |
| 29.9 | 62.5 | 0.931 | 0.553 | 0.0566 | | 29.04 | 34.01 mg | 0.9996 | 0.00128 | 0.080 | |

**PSEUDO 2ND ORDER KINETICS**

**Figure S2.** Test plots of Pseudo-first- and Pseudo-Second-Order models for MG dye adsorption on *Rhizoclonium hookeri* biochar.

**Table S5.** Parameters extracted from intraparticle diffusion model.

| **Intraparticle diffusion model** | **Kid** | **C(intercept)** | **R2** |
| --- | --- | --- | --- |
| qt = kid t1/2 + C | 0.0681 | 3.05 | 0.9624 |

**Figure S3 Test Plot of t vs t^1/2 for Intra-particle Diffusion Model**

**Figure S4.** Langmuir isotherm for MG adsorption on biochar.

**Table S6.** Langmuir and Freundlich constant for the adsorption of MG.

| **Langmuir constant** | | | | | **Freundlich constant** | | | | | | |
| --- | --- | --- | --- | --- | --- | --- | --- | --- | --- | --- | --- |
| **qmax (mg g-1)** | **KL** | **R2** | **RMSE** | **X2** | | **RL** | **Kf** | **1/n** | **R2** | **RMSE** | **X2** |
| 35.46 | 0.0286 | 0.997 | 0.060 | 0.695 | | 0.33 | 0.412 | 2.39 | 0.95 | 2.56 | 1.48 |

**Figure S.7** Freundlich isotherm for MG adsorption on *Rhizoclonium hookeri* biochar.
